# Supplementary material for: Characterization of an Mtbp Hypomorphic Allele in a Diethylnitrosamine-Induced Liver Carcinogenesis Model
Source: MDPI journal article supplement (doi:10.3390/cancers15184596), 2023-09-16
Supplement: s1 [file s1]

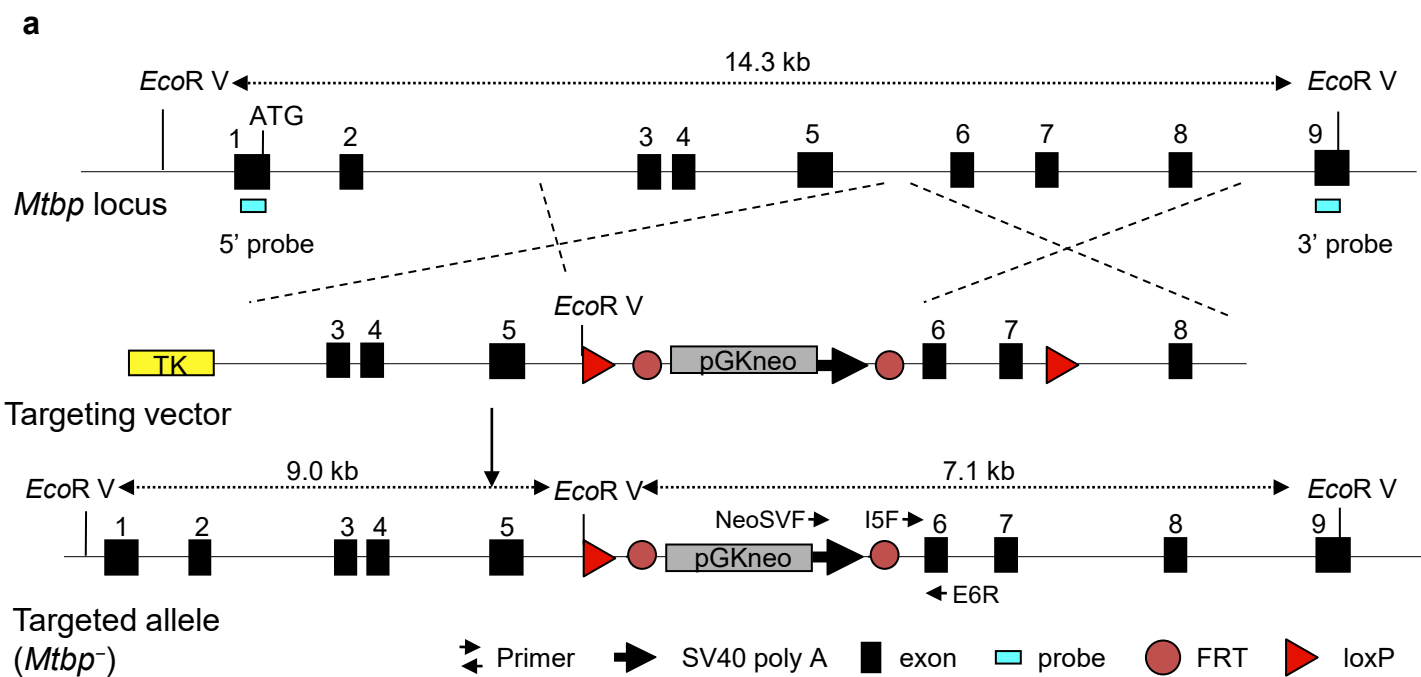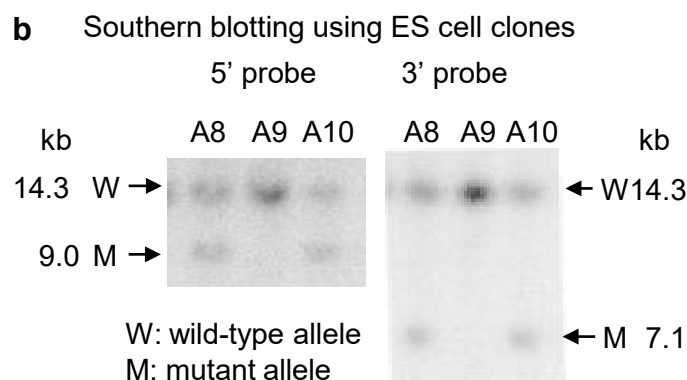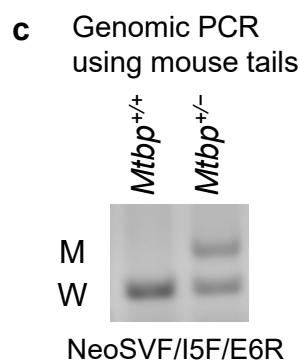

**Supplementary Figure S1. Generation of mice carrying a *Mtbp* null (*Mtbp*<sup>-</sup>) allele.** (a) Genomic organization of the murine *Mtbp* gene, a targeting vector, and a targeted allele. The *pGKneo-SV40 poly(A)* cassette was inserted into the intron 5 in the same direction as the *Mtbp* gene to block the transcription of *Mtbp*. (b) Southern blotting following *EcoRV* restriction enzyme digestion of the genomic DNA from ES cell clones (#A10, C9, A12) using the 5' and 3' probes set in exon 1 and exon 9, respectively. (c) Genomic PCR using the genomic DNA from *Mtbp*<sup>+/+</sup> and *Mtbp*<sup>+/-</sup> mice with primers of NeoSVF, I5F, and E6R, showing successful germline transmission.
