# Supplementary material for: Characterization of an Mtbp Hypomorphic Allele in a Diethylnitrosamine-Induced Liver Carcinogenesis Model
Source: MDPI journal article supplement (doi:10.3390/cancers15184596), 2023-09-16

**Figure 1**

**a**

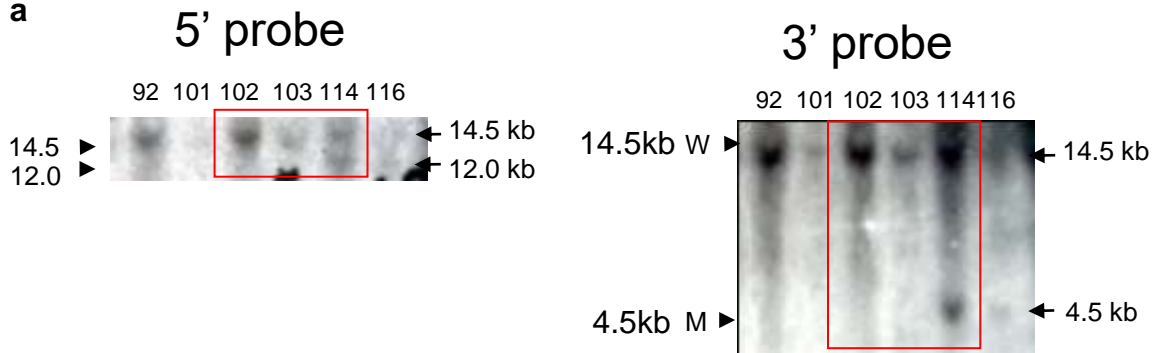

Genomic PCR  
using mouse tails

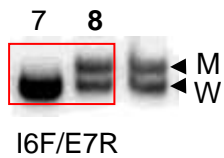

**c**

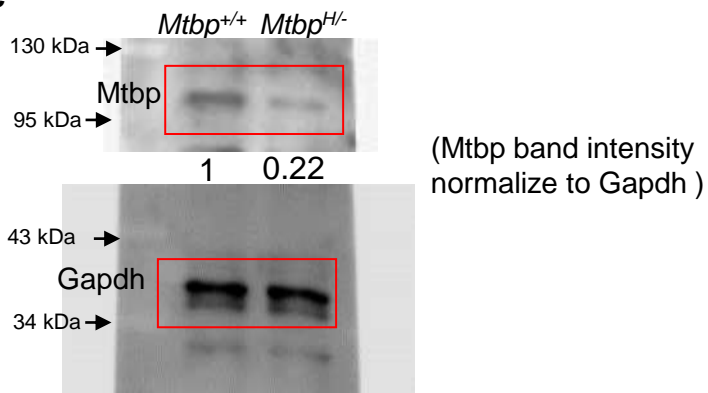

Supplementary Figure S1

b

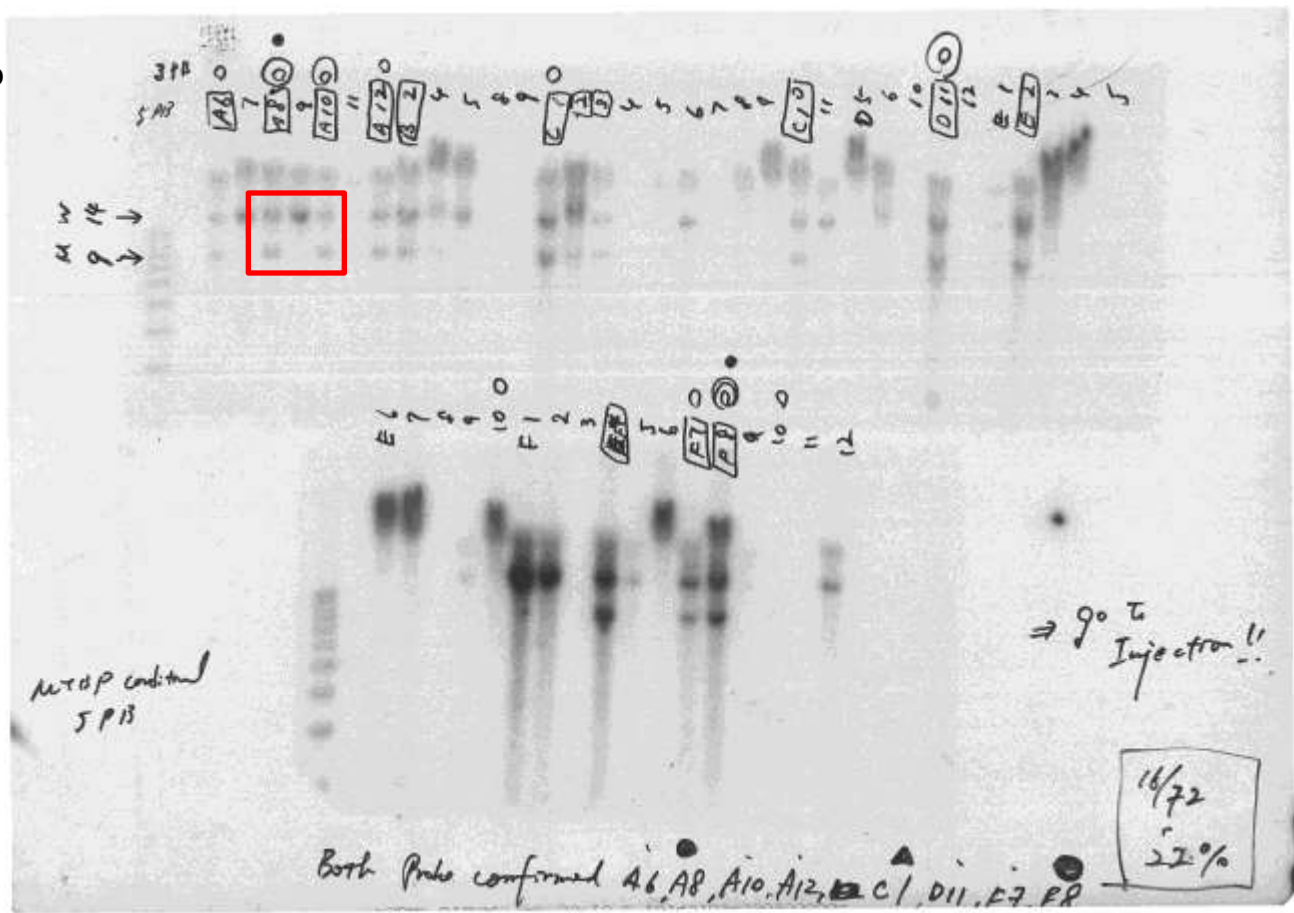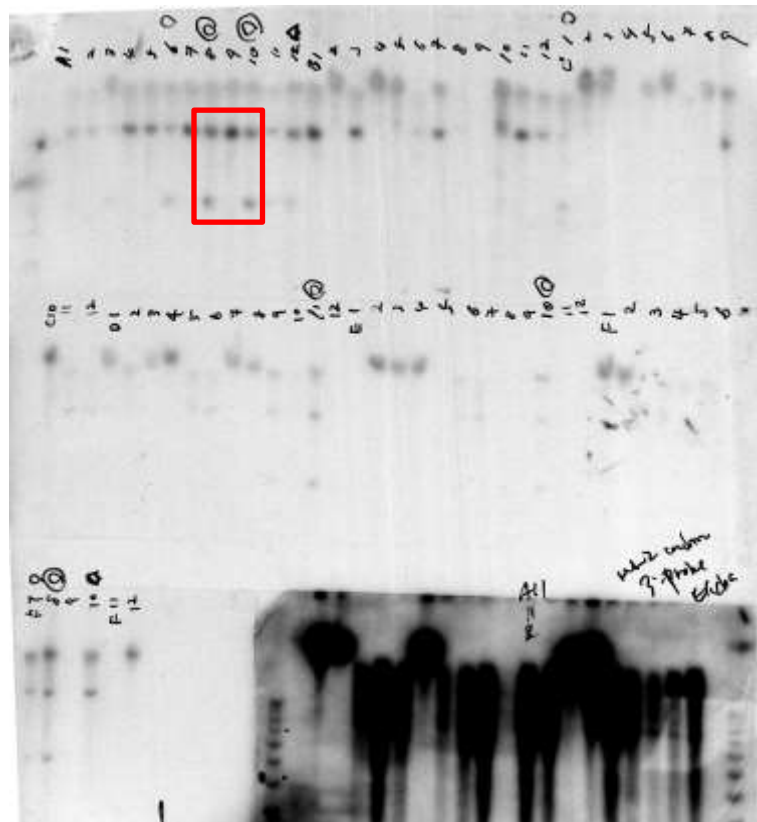

**c** Genomic PCR  
using mouse tails

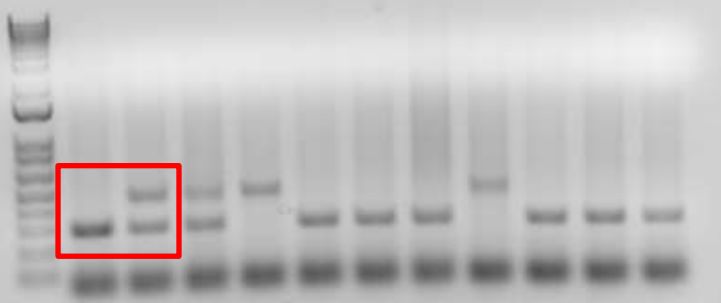

NeoSVF/I5F/E6R

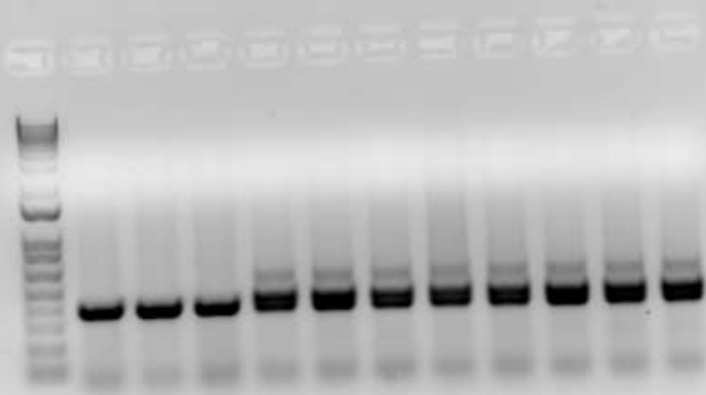

Supplement: s1 [file s1]
